# Supplementary material for: ‘Artilysation’ of endolysin λSa2lys strongly improves its enzymatic and antibacterial activity against streptococci
Source: PubMed Central journal article supplement (PMC5075790; doi:10.1038/srep35382), 2016-10-24
Supplement: srep35382-s1.pdf [file srep35382-s1.pdf]

## *Supplementary Material*

### **‘Artilysation’ of endolysin $\lambda$ Sa2lys strongly improves its enzymatic and antibacterial activity against streptococci**

Lorena Rodríguez-Rubio<sup>1,2†</sup>, Wai-Ling Chang<sup>3</sup> †, Diana Gutiérrez<sup>1</sup>, Rob Lavigne<sup>2</sup>, Beatriz Martínez<sup>1</sup>, Ana Rodríguez<sup>1</sup>, Sander Govers<sup>4</sup>, Abram Aertsen<sup>4</sup>, Christine Hirl<sup>3</sup>, Manfred Biebl<sup>3</sup>, Yves Briers<sup>5\*</sup> and Pilar García<sup>1\*</sup>.

\*Corresponding authors; †Contributed equally

**Supplementary Figures**

**Supplementary file 1. Purification and stability of  $\lambda$ Sa2lys endolysin and its derivative****Artilysin, Art-240.** Electrophoretic profile of proteins A) endolysin  $\lambda$ Sa2lys and B) Art-240.

Lane 1, PeqLab Protein Marker I standard; lane 2, total fraction; lane 3, cytoplasmic fraction;

lane 4, column flow through and lane 5 purified protein. C) Melting curves of both  $\lambda$ Sa2lysendolysin (triangle) and Art-240 (circle) performed by monitoring loss of  $\alpha$ -helicity of

proteins by CD spectroscopy at 222 nm. Cooperative melting is observed for each protein in

a similar way.  $T_m$  values are 63.9°C and 61.1°C for Art-240 and  $\lambda$ Sa2lys, respectively.

A)

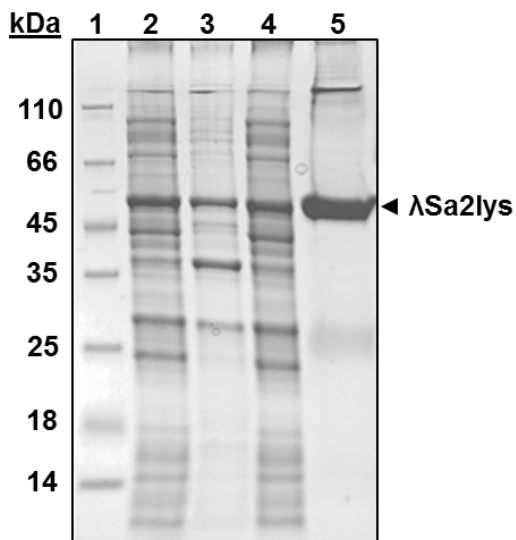

B)

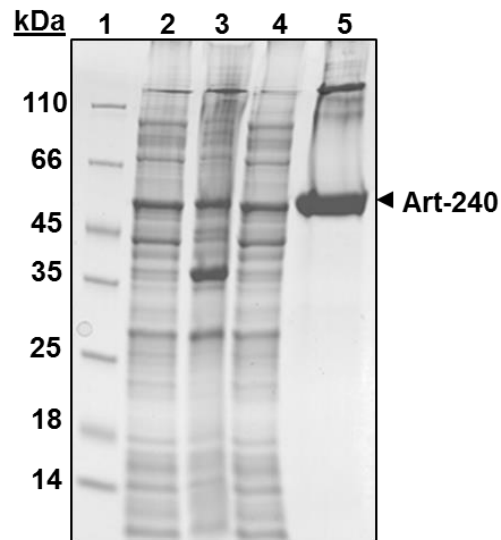

C)

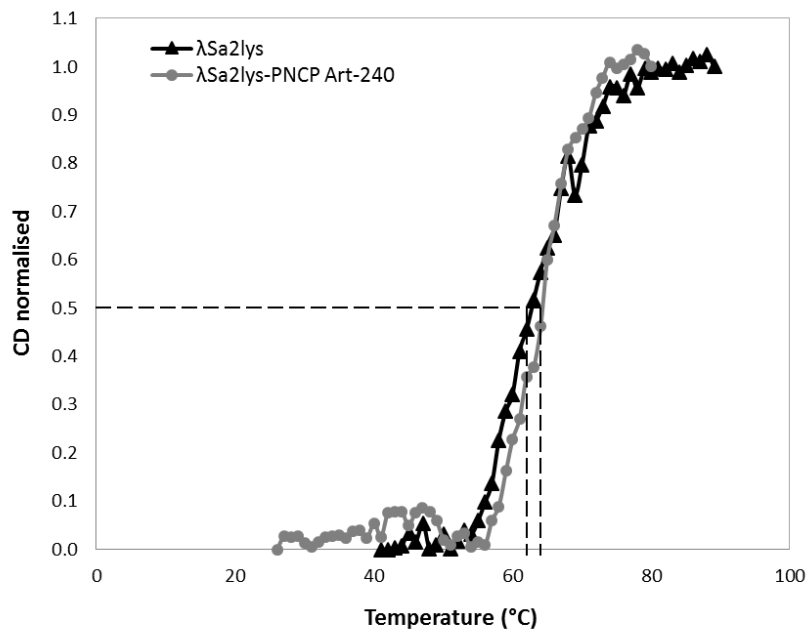

**Supplementary file 2. Plate lysis assay of endolysin  $\lambda$ Sa2lys and Art-240 against *S. agalactiae* LiCC S461.** Spots were dropped with 1, 2, and 5  $\mu$ M of each protein. Control spots are the stock buffer of  $\lambda$ Sa2lys and Art-240 (20 mM HEPES 500 mM NaCl pH 7.4). +++ very high, ++ high, + moderate, +/- low, --- no activity.

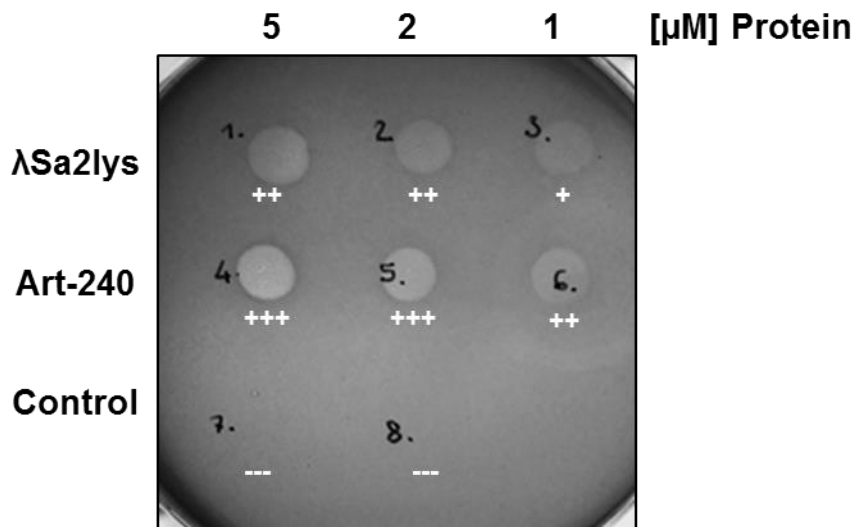

**Supplementary file 3. Effect of pH on enzymatic activity of  $\lambda$ Sa2lys endolysin and Art-240.** The activity was determined by a turbidity reduction assay with equimolar amounts (0.1  $\mu$ M) of  $\lambda$ Sa2lys (grey) and Art-240 (white), and reported as the slopes derived from a 60-min curves from both *S. uberis* LiCC S648 performed under various pH conditions. Data are means  $\pm$  standard deviations of three replicated. Student *t*-test was performed to compare the activity of  $\lambda$ Sa2lys and Art-240 within each pH value.  $P < 0.01$ ;  $P < 0.001$ .

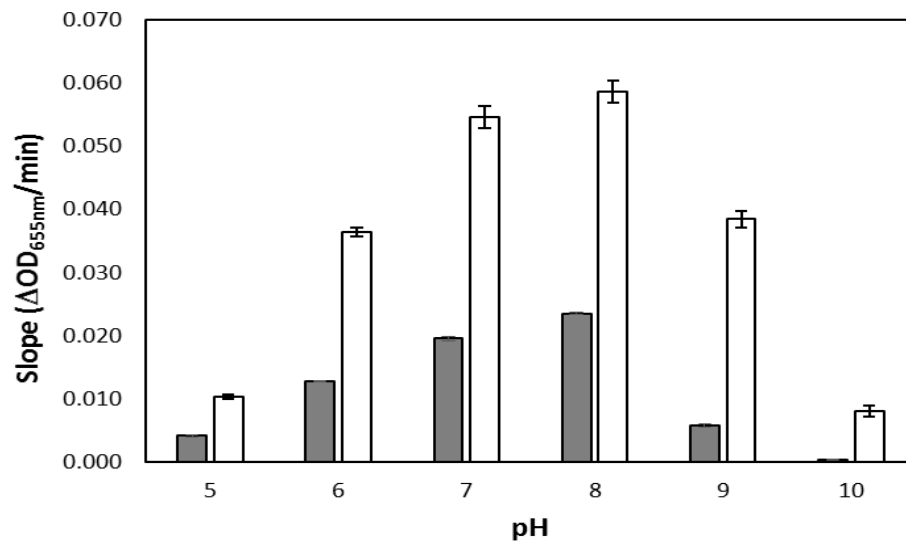

**Supplementary file 4. Effect of NaCl on enzymatic activity of  $\lambda$ Sa2lys endolysin and Art-240.**

The activity was determined by using a turbidity reduction assay with equimolar amounts (0.1  $\mu$ M) of  $\lambda$ Sa2lys (grey) and Art-240 (white), and reported as the slopes derived from a 60-min curves from *S. uberis* LiCC S648 performed under various sodium chloride (NaCl) conditions. Data are means  $\pm$  standard of three replicated. Student *t*-test was performed to compare the activity of  $\lambda$ Sa2lys and Art-240 within each NaCl concentration.  $P < 0.01$ ;  $P < 0.001$ .

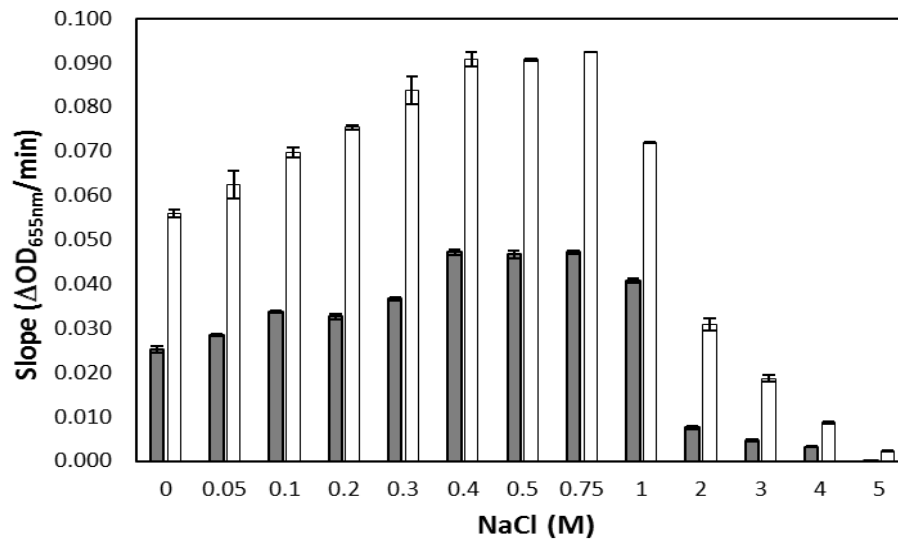

**Movie S1. Real-time movie of *S. uberis* LiCC S648 exposed to equimolar amounts (0.1  $\mu$ M) of Art-240,  $\lambda$ Sa2lys, PCNP and buffer.** Exponentially growing cells were washed three times with buffer and subsequently mixed (1:1) with 0.2  $\mu$ M of the corresponding enzyme/peptide. The mixture was dropped on agarose pads and cells were monitored in real-time.
